# Supplementary material for: Erythrocyte Membrane Cloaked Curcumin-Loaded Nanoparticles for Enhanced Chemotherapy
Source: Pharmaceutics. 2019 Aug 23;11(9):429. doi: 10.3390/pharmaceutics11090429 (PMC6781301; doi:10.3390/pharmaceutics11090429)
Supplement: Supplementary file 1 [file pharmaceutics-11-00429-s001.pdf]

# Supplementary Materials: Erythrocyte Membrane Cloaked Curcumin-Loaded Nanoparticles for Enhanced Chemotherapy

Xiaotian Xie, Haijun Wang, Gareth R. Williams, Yanbo Yang, Yongli Zheng, Junzi Wu and Li-Min Zhu

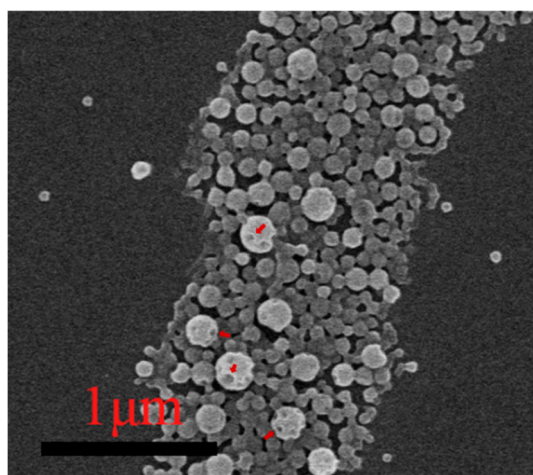

**Figure S1.** A FESEM images of porous PLGA NPs prepared at 300 rpm. Pores are marked with red arrows.

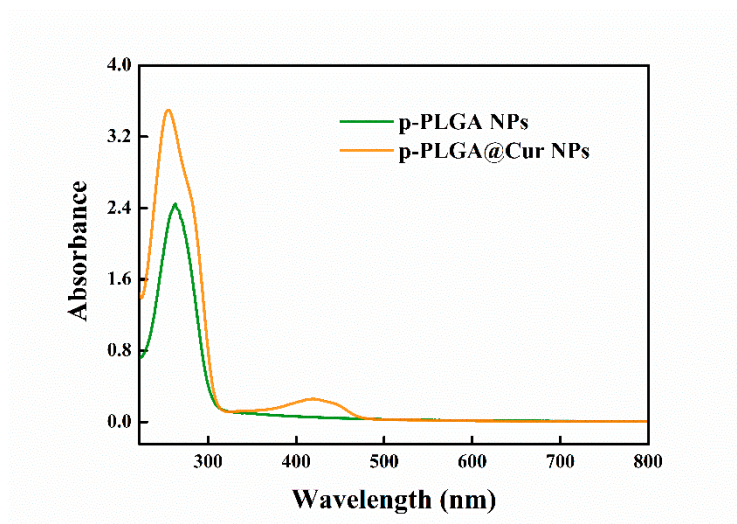

**Figure S2.** UV-vis spectra of p-PLGA and p-PLGA@Cur NPs.

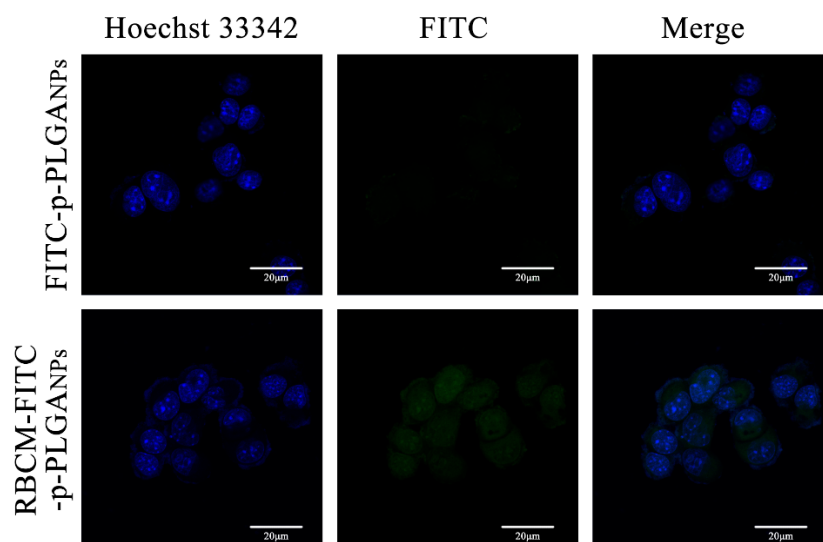

**Figure S3.** CLSM images of 4T1 cells exposed to FITC-p-PLGA and RBCM-FITC-p-PLGA NPs. Representative images from three independent experiments are shown.

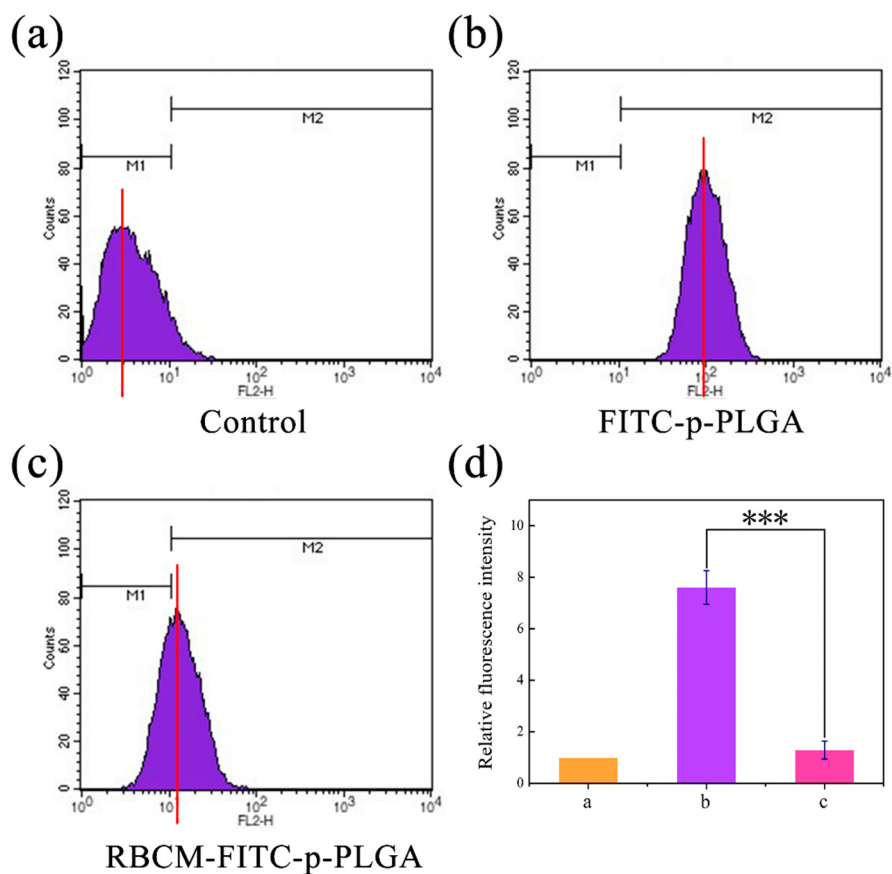

**Figure S4.** Flow cytometry data for: (a) untreated RAW 264.7 cells and RAW 264.7 cells incubated for 4 h with FITC labeled (b) p-PLGA NPs or (c) RBCM-p-PLGA NPs. (d) The relative fluorescence intensity values calculated from panels (a)–(c). The data are represented as mean  $\pm$  S.D. ( $n = 3$ ). \*\*\*  $p < 0.001$ .

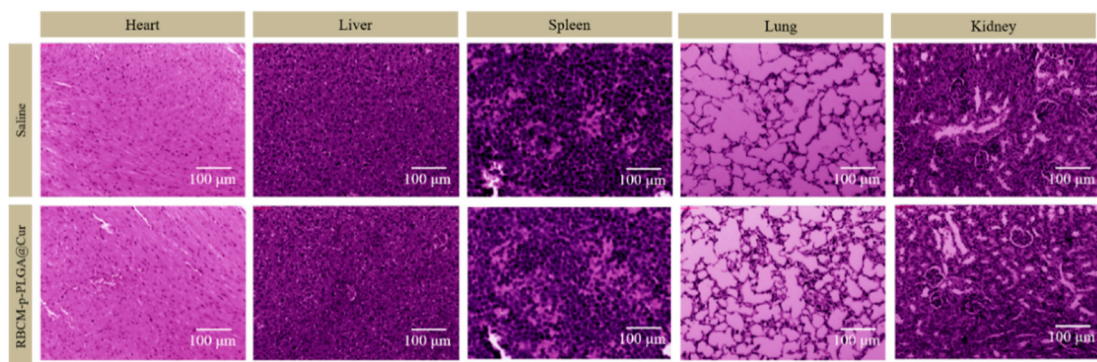

**Figure S5.** H&E staining images (100×) of the major organs from H22 tumor-bearing mice after treatment with saline or RBCM-p-PLGA@Cur NPs.

**Table S1.** The results of Peppas analysis of the drug release data.

| Sample          | $T = 37\text{ }^{\circ}\text{C}$         |
|-----------------|------------------------------------------|
| PLGA@Cur        | $Q = 6.848t^{0.389}$ ( $R^2 = 0.9920$ )  |
| p-PLGA@Cur      | $Q = 11.898t^{0.606}$ ( $R^2 = 0.8643$ ) |
| RBCM-p-PLGA@Cur | $Q = 8.141t^{0.595}$ ( $R^2 = 0.9783$ )  |
